# Supplementary material for: Effects of prohexadione calcium spraying during the booting stage on panicle traits, yield, and related physiological characteristics of rice under salt stress
Source: PeerJ. 2023 Jan 23;11:e14673. doi: 10.7717/peerj.14673 (PMC9879151; doi:10.7717/peerj.14673)
Supplement: Supplemental Information 3 — The data in the table are the mean ± standard error (SE), and different lowercase letters in the same column indicate that the mean values of the replicates were significantly different among the treatments (p < 0.05). HHZ: Huanghuazhan rice cultivars. XLY900: Xiangliangyou900 rice cultivars. The raw data showed differences in physiological indicators between the two rice cultivars under different treatments. These indicators were used for analysis to explore the mitigating effect of prohexadione-calcium on salt stress. [file peerj-11-14673-s003.xlsx]

## Sheet: TableS1
Table S1 Effects of Pro-Ca spraying at the booting stage on rice growth under salt stress.
HHZ	Treatments	Plant height(cm)	Leaf area(cm²)	Shoot dry weight(g)		HHZ	Plant height(cm)				XLY900	Plant height(cm)
	CK	110.9	55.35	16.39			Treatments	Average	SE			Treatments	Average	SE
	CK	111.6	65.88	17.46			CK	111.867	0.648931			CK	112.233	0.856997
	CK	113.1	66.75	20.33			NaCl	105.533	0.785988			NaCl	107.033	1.56027
	NaCl	104	46.17	12.44			Pro-Ca + NaCl	106.767	0.808977			Pro-Ca + NaCl	108.267	1.02686
	NaCl	106	46.8	13.93			Pro-Ca	105.967	0.31798			Pro-Ca	108.333	0.883805
	NaCl	106.6	47.025	17.75
	Pro-Ca + NaCl	105.4	55.845	14.41			Leaf area(cm²)					Leaf area(cm²)
	Pro-Ca + NaCl	106.7	62.505	14.45			Treatments	Average	SE			Treatments	Average	SE
	Pro-Ca + NaCl	108.2	64.26	15.31			CK	62.66	3.66362			CK	64.3425	2.08334
	Pro-Ca	105.4	59.25	13.32			NaCl	46.665	0.255881			NaCl	52.7	2.85832
	Pro-Ca	106	60	15.21			Pro-Ca + NaCl	60.87	2.56307			Pro-Ca + NaCl	61.045	1.17657
	Pro-Ca	106.5	63.72	17.96			Pro-Ca	60.99	1.38206			Pro-Ca	64.2675	1.09413
XLY900	Treatments	Plant height(cm)	Leaf area(cm²)	Shoot dry weight(g)			Shoot dry weight(g)					Shoot dry weight(g)
	CK	110.6	60.1875	17.38			Treatments	Average	SE			Treatments	Average	SE
	CK	112.6	66.15	19.04			CK	18.06	1.17628			CK	19.04	0.958401
	CK	113.5	66.69	20.7			NaCl	14.7067	1.58129			NaCl	16.4667	2.04556
	NaCl	105	47.7	14.1			Pro-Ca + NaCl	14.7233	0.293561			Pro-Ca + NaCl	17.1033	2.0703
	NaCl	106	52.8	14.76			Pro-Ca	15.4967	1.3471			Pro-Ca	20.0067	2.48677
	NaCl	110.1	57.6	20.54
	Pro-Ca + NaCl	106.7	58.905	14.66
	Pro-Ca + NaCl	107.9	61.2675	15.43
	Pro-Ca + NaCl	110.2	62.9625	21.22
	Pro-Ca	106.6	62.82	17.48
	Pro-Ca	108.9	63.57	17.56
	Pro-Ca	109.5	66.4125	24.98

## Sheet: Figure1
Figure 1: Effects of Pro-Ca spraying at booting stage on SPAD and photosynthetic parameters of rice under salt stress.
HHZ	Treatments	SPAD	Pn（μmol·m-2·s-1）	Gs（mmol·m-2·s-1）	Ci（μmol·mol-1）	Tr（mmol·m-2·s-1）	AMC（mmol·m-2·s-1）		HHZ	SPAD				XLY900	SPAD
	CK	45.6	20.5	0.431	297	6.36	0.0690236			Treatments	Average	SE			Treatments	Average	SE
	CK	45.7	21.4	0.505	303	6.91	0.0706271			CK	45.7667	0.12019			CK	47.7333	0.1453
	CK	46	22.5	0.408	281	6.46	0.0800712			NaCl	40.6667	0.08819			NaCl	45.3	0.23094
	NaCl	40.5	13.6	0.199	283	3.07	0.0480565			Pro-Ca + NaCl	44.8333	0.27285			Pro-Ca + NaCl	47.4	0.05774
	NaCl	40.7	14.9	0.203	274	3.06	0.0543796			Pro-Ca	46.9333	0.1453			Pro-Ca	48.2333	0.17638
	NaCl	40.8	15.6	0.24	284	3.68	0.0549296
	Pro-Ca + NaCl	44.3	18.7	0.306	284	4.7	0.0658451			Pn（μmol·m-2·s-1）					Pn（μmol·m-2·s-1）
	Pro-Ca + NaCl	45	20.2	0.369	287	5.48	0.0703833			Treatments	Average	SE			Treatments	Average	SE
	Pro-Ca + NaCl	45.2	23	0.39	279	5.52	0.0824373			CK	21.4667	0.57831			CK	24.6	0.32146
	Pro-Ca	46.7	20.9	0.422	294	6.02	0.0710884			NaCl	14.7	0.58595			NaCl	16.4333	0.92075
	Pro-Ca	46.9	21.1	0.44	296	6.27	0.0712838			Pro-Ca + NaCl	20.6333	1.26007			Pro-Ca + NaCl	17.5333	0.81921
	Pro-Ca	47.2	21.2	0.426	293	5.99	0.0723549			Pro-Ca	21.0667	0.08819			Pro-Ca	22.4667	0.36667
XLY900	Treatments	SPAD	Pn（μmol·m-2·s-1）	Gs（mmol·m-2·s-1）	Ci（μmol·mol-1）	Tr（mmol·m-2·s-1）	AMC（mmol·m-2·s-1）			Gs（mmol·m-2·s-1）					Gs（mmol·m-2·s-1）
	CK	47.5	24	0.511	293	7.53	0.0819113			Treatments	Average	SE			Treatments	Average	SE
	CK	47.7	24.7	0.429	274	6.9	0.090146			CK	0.448	0.02926			CK	0.46233	0.02488
	CK	48	25.1	0.447	276	6.99	0.090942			NaCl	0.214	0.01305			NaCl	0.238	0.01646
	NaCl	44.9	15.1	0.209	274	3.71	0.0551095			Pro-Ca + NaCl	0.355	0.02524			Pro-Ca + NaCl	0.288	0.036
	NaCl	45.3	16	0.266	290	4.37	0.0551724			Pro-Ca	0.42933	0.00546			Pro-Ca	0.395	0.007
	NaCl	45.7	18.2	0.239	261	3.97	0.0697318
	Pro-Ca + NaCl	47.3	16	0.251	282	4.57	0.0567376			Ci（μmol·mol-1）					Ci（μmol·mol-1）
	Pro-Ca + NaCl	47.4	17.8	0.253	267	4.71	0.0666667			Treatments	Average	SE			Treatments	Average	SE
	Pro-Ca + NaCl	47.5	18.8	0.36	294	5.96	0.0639456			CK	293.667	6.56591			CK	281	6.02771
	Pro-Ca	47.9	22.1	0.402	288	6.06	0.0767361			NaCl	280.333	3.1798			NaCl	275	8.3865
	Pro-Ca	48.3	22.1	0.402	288	6.06	0.0767361			Pro-Ca + NaCl	283.333	2.33333			Pro-Ca + NaCl	281	7.81025
	Pro-Ca	48.5	23.2	0.381	277	5.89	0.0837545			Pro-Ca	294.333	0.88192			Pro-Ca	284.333	3.66667
										Tr（mmol·m-2·s-1）					Tr（mmol·m-2·s-1）
										Treatments	Average	SE			Treatments	Average	SE
										CK	6.57667	0.16915			CK	7.14	0.19672
										NaCl	3.27	0.20502			NaCl	4.01667	0.19195
										Pro-Ca + NaCl	5.23333	0.26692			Pro-Ca + NaCl	5.08	0.44185
										Pro-Ca	6.09333	0.08876			Pro-Ca	6.00333	0.05667
										AMC（mmol·m-2·s-1）					AMC（mmol·m-2·s-1）
										Treatments	Average	SE			Treatments	Average	SE
										CK	0.07324	0.00345			CK	0.08767	0.00289
										NaCl	0.05246	0.00221			NaCl	0.06	0.00486
										Pro-Ca + NaCl	0.07289	0.00495			Pro-Ca + NaCl	0.06245	0.00296
										Pro-Ca	0.07158	0.000393673			Pro-Ca	0.07908	0.00234

## Sheet: Figure2
Figure 2: Effects of spraying Pro-Ca at the booting stage on soluble protein and proline content of rice leaves and panicles under salt stress.
HHZ	Leaf	Treatments	Soluble protein content(mg·g-1)	Proline content(μg·g-1 FW)		Panicle	Treatments	Soluble protein content(mg·g-1)	Proline content(μg·g-1 FW)		HHZ	Leaf	Soluble protein content(mg·g-1)				Panicle	Soluble protein content(mg·g-1)
		CK	31.8773	92.2911			CK	27.8175	506.109				Treatments	Average	SE			Treatments	Average	SE
		CK	32.1316	90.5093			CK	28.6263	504.799				CK	31.977	0.07837			CK	28.2514	0.23533
		CK	31.9221	91.1389			CK	28.3105	514.099				NaCl	33.299	0.11935			NaCl	29.6383	0.15513
		NaCl	33.3202	101.295			NaCl	29.5596	697.888				Pro-Ca + NaCl	33.6359	0.07066			Pro-Ca + NaCl	31.2366	0.17918
		NaCl	33.0825	100.382			NaCl	29.4177	705.456				Pro-Ca	33.2294	0.08143			Pro-Ca	27.6554	0.11107
		NaCl	33.4943	103.083			NaCl	29.9375	702.1
		Pro-Ca + NaCl	33.5354	116.727			Pro-Ca + NaCl	30.9825	1071.57			Leaf	Proline content(μg·g-1 FW)				Panicle	Proline content(μg·g-1 FW)
		Pro-Ca + NaCl	33.7722	117.004			Pro-Ca + NaCl	31.1448	1065.65				Treatments	Average	SE			Treatments	Average	SE
		Pro-Ca + NaCl	33.6	115.55			Pro-Ca + NaCl	31.5825	1038.76				CK	91.3131	0.5217			CK	508.336	2.9063
		Pro-Ca	33.229	100.873			Pro-Ca	27.7078	411.759				NaCl	101.587	0.79327			NaCl	701.815	2.18939
		Pro-Ca	33.3707	102.359			Pro-Ca	27.4423	441.78				Pro-Ca + NaCl	116.427	0.44587			Pro-Ca + NaCl	1058.66	10.0951
		Pro-Ca	33.0886	105.394			Pro-Ca	27.8162	438.279				Pro-Ca	102.875	1.33031			Pro-Ca	430.606	9.47749
XLY900	Leaf	Treatments	Soluble protein content(mg·g-1)	Proline content(μg·g-1 FW)		Panicle	Treatments	Soluble protein content(mg·g-1)	Proline content(μg·g-1 FW)		XLY900	Leaf	Soluble protein content(mg·g-1)				Panicle	Soluble protein content(mg·g-1)
		CK	33.089	124.301			CK	28.9564	578.264				Treatments	Average	SE			Treatments	Average	SE
		CK	31.732	120.146			CK	29.8956	579.347				CK	32.4699	0.3962			CK	29.0575	0.45753
		CK	32.5888	123.823			CK	28.3204	607.819				NaCl	33.4898	0.03904			NaCl	30.1144	0.13553
		NaCl	33.4789	126.102			NaCl	29.8733	625.071				Pro-Ca + NaCl	34.0554	0.19054			Pro-Ca + NaCl	30.3377	0.13242
		NaCl	33.4284	132.524			NaCl	30.3423	628.66				Pro-Ca	33.6168	0.15129			Pro-Ca	29.7921	0.25075
		NaCl	33.5623	130.573			NaCl	30.1274	615.885
		Pro-Ca + NaCl	33.6815	143.159			Pro-Ca + NaCl	30.6023	1001.19			Leaf	Proline content(μg·g-1 FW)				Panicle	Proline content(μg·g-1 FW)
		Pro-Ca + NaCl	34.1783	143.845			Pro-Ca + NaCl	30.1962	1005.39				Treatments	Average	SE			Treatments	Average	SE
		Pro-Ca + NaCl	34.3063	146.036			Pro-Ca + NaCl	30.2145	1030.34				CK	122.757	1.31272			CK	588.477	9.67616
		Pro-Ca	33.6017	122.123			Pro-Ca	29.3076	858.053				NaCl	129.733	1.90086			NaCl	623.205	3.80404
		Pro-Ca	33.8861	124.686			Pro-Ca	29.9223	843.792				Pro-Ca + NaCl	144.347	0.86767			Pro-Ca + NaCl	1012.31	9.09768
		Pro-Ca	33.3627	123.917			Pro-Ca	30.1465	826.389				Pro-Ca	123.575	0.75927			Pro-Ca	842.745	9.15562

## Sheet: Figure3
Figure 3: Effects of Pro-Ca spraying at the booting stage on the activities of antioxidant enzymes of rice leaves and panicles under salt stress.
HHZ	Leaf	Treatments	SOD activity(U·g-1 FW)	POD activity(U·g-1 FW)	CAT activity(U·g-1 FW)	APX activity(U·g-1 FW)		Panicle	Treatments	SOD activity(U·g-1 FW)	POD activity(U·g-1 FW)	CAT activity(U·g-1 FW)	APX activity(U·g-1 FW)		HHZ	Leaf	SOD activity(U·g-1 FW)				Panicle	SOD activity(U·g-1 FW)
		CK	614.773	15172.7	1721.33	1277.73			CK	460.487	24311.3	448.133	1530.67				Treatments	Average	SE			Treatments	Average	SE
		CK	555.418	15333	1710.4	1490.13			CK	416.513	24356.7	460.267	1262.4				CK	587.999	17.3784			CK	435.361	13.0764
		CK	593.806	14116.3	1847.73	1116.27			CK	429.082	24272.3	455.467	1202.67				NaCl	476.757	15.4357			NaCl	430.329	2.72338
		NaCl	505.944	13456.3	1500.13	922.267			NaCl	431.22	18254.3	458.8	1515.47				Pro-Ca + NaCl	638.366	3.8697			Pro-Ca + NaCl	543.31	1.65769
		NaCl	453.453	13665.7	1635.6	972.8			NaCl	425.23	18008.7	382.8	1540.13				Pro-Ca	681.191	16.2547			Pro-Ca	356.137	10.588
		NaCl	470.874	13229.7	1707.33	976.533			NaCl	434.537	18454.3	455.6	1423.47
		Pro-Ca + NaCl	632.27	11243.3	1782.93	1300.8			Pro-Ca + NaCl	540.546	21267.3	610.4	2033.47			Leaf	POD activity(U·g-1 FW)				Panicle	POD activity(U·g-1 FW)
		Pro-Ca + NaCl	645.543	11996.3	1871.6	1615.47			Pro-Ca + NaCl	543.107	21340	614.8	2230.93				Treatments	Average	SE			Treatments	Average	SE
		Pro-Ca + NaCl	637.285	10931	1771.07	1071.33			Pro-Ca + NaCl	546.277	21816.3	620.667	1888.4				CK	14673.1	151.625			CK	24313.4	24.3678
		Pro-Ca	707.613	13244.7	1738.53	1027.73			Pro-Ca	348.304	13660.7	276.4	1387.87				NaCl	13053.3	442.39			NaCl	18239.1	128.878
		Pro-Ca	684.384	13658.3	1841.33	1252.8			Pro-Ca	377.092	13624	302.4	1254				Pro-Ca + NaCl	18219.8	377.35			Pro-Ca + NaCl	21474.6	172.172
		Pro-Ca	651.577	13263.7	1767.47	1078.93			Pro-Ca	343.015	13576.3	295.2	1361.33				Pro-Ca	15312.9	92.1212			Pro-Ca	13620.3	24.4139
XLY900	Leaf	Treatments	SOD activity(U·g-1 FW)	POD activity(U·g-1 FW)	CAT activity(U·g-1 FW)	APX activity(U·g-1 FW)		Panicle	Treatments	SOD activity(U·g-1 FW)	POD activity(U·g-1 FW)	CAT activity(U·g-1 FW)	APX activity(U·g-1 FW)			Leaf	CAT activity(U·g-1 FW)				Panicle	CAT activity(U·g-1 FW)
		CK	738.044	16148.7	1780.93	1110.53			CK	482.676	31712.7	437.2	1884				Treatments	Average	SE			Treatments	Average	SE
		CK	756.257	16873.3	1737.6	881.333			CK	512.072	36278.3	431.6	1642.53				CK	1759.82	44.0687			CK	454.622	3.52795
		CK	772.623	16910.7	2038.67	1228.8			CK	464.08	32680.3	531.6	1837.73				NaCl	1614.36	60.7494			NaCl	432.4	24.8172
		NaCl	564.808	13602.3	1695.6	1011.87			NaCl	502.027	31397.3	494.267	1616.8				Pro-Ca + NaCl	1808.53	31.7189			Pro-Ca + NaCl	615.289	2.9738
		NaCl	460.429	13667.3	1740.4	1070.53			NaCl	516.034	32315.7	550.267	1439.6				Pro-Ca	1782.44	30.6062			Pro-Ca	291.333	7.75056
		NaCl	638.341	12680.7	1648.93	697.867			NaCl	510.966	33617	543.6	1620.13
		Pro-Ca + NaCl	829.149	17574.7	1777.07	1288.27			Pro-Ca + NaCl	538.334	37527.3	553.867	1851.6			Leaf	APX activity(U·g-1 FW)				Panicle	APX activity(U·g-1 FW)
		Pro-Ca + NaCl	889.522	16892.3	1773.6	888.267			Pro-Ca + NaCl	540.361	37954.7	650.4	1881.87				Treatments	Average	SE			Treatments	Average	SE
		Pro-Ca + NaCl	846.684	16814.7	1885.6	904.267			Pro-Ca + NaCl	501.087	37400	663.2	1738.67				CK	1294.71	108.259			CK	1331.91	100.863
		Pro-Ca	818.289	13925	1813.07	792.267			Pro-Ca	523.129	36060	623.467	1971.47				NaCl	957.2	17.4999			NaCl	1493.02	35.4993
		Pro-Ca	824.247	13132	1915.87	1188.4			Pro-Ca	510.136	35933.3	604.133	1656.4				Pro-Ca + NaCl	1329.2	157.718			Pro-Ca + NaCl	2050.93	99.2658
		Pro-Ca	825.039	12995.7	1845.33	747.2			Pro-Ca	523.553	36776.7	698	1758.53				Pro-Ca	1119.82	68.1119			Pro-Ca	1334.4	40.9232
															XLY900	Leaf	SOD activity(U·g-1 FW)				Panicle	SOD activity(U·g-1 FW)
																	Treatments	Average	SE			Treatments	Average	SE
																	CK	755.641	9.98694			CK	486.276	13.9703
																	NaCl	554.526	51.6154			NaCl	509.676	4.0945
																	Pro-Ca + NaCl	855.118	17.931			Pro-Ca + NaCl	526.594	12.7668
																	Pro-Ca	822.525	2.1303			Pro-Ca	518.94	4.40335
																Leaf	POD activity(U·g-1 FW)				Panicle	POD activity(U·g-1 FW)
																	Treatments	Average	SE			Treatments	Average	SE
																	CK	16644.2	248.012			CK	33557.1	1388.99
																	NaCl	13316.8	318.609			NaCl	32443.3	643.934
																	Pro-Ca + NaCl	17093.9	241.432			Pro-Ca + NaCl	37627.3	167.744
																	Pro-Ca	13350.9	289.741			Pro-Ca	36256.7	262.559
																Leaf	CAT activity(U·g-1 FW)				Panicle	CAT activity(U·g-1 FW)
																	Treatments	Average	SE			Treatments	Average	SE
																	CK	1852.4	93.9697			CK	466.8	32.4403
																	NaCl	1694.98	26.406			NaCl	529.378	17.6607
																	Pro-Ca + NaCl	1812.09	36.7692			Pro-Ca + NaCl	622.489	34.5095
																	Pro-Ca	1858.09	30.3534			Pro-Ca	641.867	28.6162
																Leaf	APX activity(U·g-1 FW)				Panicle	APX activity(U·g-1 FW)
																	Treatments	Average	SE			Treatments	Average	SE
																	CK	1073.56	101.995			CK	1788.09	73.9932
																	NaCl	926.756	115.691			NaCl	1558.84	59.63
																	Pro-Ca + NaCl	1026.93	130.748			Pro-Ca + NaCl	1824.04	43.5739
																	Pro-Ca	909.289	140.161			Pro-Ca	1795.47	92.8077

## Sheet: Figure4
Figure 4: Effects of Pro-Ca spraying at the booting stage on AsA content and GSH content of rice leaves and panicles under salt stress.
HHZ	Leaf	Treatments	AsA content(μg·g-1)	GSH content(μg·g-1)		Panicle	Treatments	AsA content(μg·g-1)	GSH content(μg·g-1)		HHZ	Leaf	AsA content(μg·g-1)				Panicle	AsA content(μg·g-1)
		CK	381.868	615.574			CK	474.335	535.984				Treatments	Average	SE			Treatments	Average	SE
		CK	387.982	614.098			CK	459.055	525.984				CK	378.847	6.32895			CK	468.275	4.68521
		CK	366.692	599.098			CK	471.434	531.23				NaCl	322.797	4.20939			NaCl	428.881	9.8513
		NaCl	315.128	546.967			NaCl	443.029	506.066				Pro-Ca + NaCl	461.825	11.7575			Pro-Ca + NaCl	479.772	10.2259
		NaCl	329.639	544.18			NaCl	433.683	514.508				Pro-Ca	377.242	2.22406			Pro-Ca	359.184	5.43452
		NaCl	323.626	554.508			NaCl	409.932	507.131
		Pro-Ca + NaCl	441.194	578.197			Pro-Ca + NaCl	459.963	512.459			Leaf	GSH content(μg·g-1)				Panicle	GSH content(μg·g-1)
		Pro-Ca + NaCl	462.37	657.623			Pro-Ca + NaCl	494.081	511.803				Treatments	Average	SE			Treatments	Average	SE
		Pro-Ca + NaCl	481.912	625.574			Pro-Ca + NaCl	485.271	517.295				CK	609.59	5.26316			CK	531.066	2.88791
		Pro-Ca	372.881	567.623			Pro-Ca	362.066	511.23				NaCl	548.552	3.08489			NaCl	509.235	2.65449
		Pro-Ca	380.181	575.082			Pro-Ca	348.667	529.262				Pro-Ca + NaCl	620.464	23.0703			Pro-Ca + NaCl	513.852	1.73169
		Pro-Ca	378.665	603.934			Pro-Ca	366.819	517.459				Pro-Ca	582.213	11.0721			Pro-Ca	519.317	5.28786
XLY900	Leaf	Treatments	AsA content(μg·g-1)	GSH content(μg·g-1)		Panicle	Treatments	AsA content(μg·g-1)	GSH content(μg·g-1)		XLY900	Leaf	AsA content(μg·g-1)				Panicle	AsA content(μg·g-1)
		CK	328.106	630.246			CK	460.597	519.426				Treatments	Average	SE			Treatments	Average	SE
		CK	322.982	577.869			CK	469.648	521.066				CK	327.057	2.11594			CK	460.405	5.39221
		CK	330.084	576.557			CK	450.971	511.721				NaCl	250.79	17.82			NaCl	415.698	7.51678
		NaCl	267.771	534.918			NaCl	426.683	499.098				Pro-Ca + NaCl	273.875	5.14663			Pro-Ca + NaCl	489.982	11.4831
		NaCl	215.163	525.574			NaCl	401.317	527.787				Pro-Ca	317.542	8.35297			Pro-Ca	435.875	10.0176
		NaCl	269.436	549.344			NaCl	419.095	515.328
		Pro-Ca + NaCl	280.881	630.902			Pro-Ca + NaCl	501.421	505.082			Leaf	GSH content(μg·g-1)				Panicle	GSH content(μg·g-1)
		Pro-Ca + NaCl	263.841	650.164			Pro-Ca + NaCl	467.015	521.885				Treatments	Average	SE			Treatments	Average	SE
		Pro-Ca + NaCl	276.903	654.59			Pro-Ca + NaCl	501.509	514.836				CK	594.891	17.6817			CK	517.404	2.88067
		Pro-Ca	332.476	556.148			Pro-Ca	416.524	521.885				NaCl	536.612	6.91403			NaCl	514.071	8.30547
		Pro-Ca	303.59	555.246			Pro-Ca	441.055	510.82				Pro-Ca + NaCl	645.219	7.27161			Pro-Ca + NaCl	513.934	4.87159
		Pro-Ca	316.559	552.131			Pro-Ca	450.046	533.361				Pro-Ca	554.508	1.21669			Pro-Ca	522.022	6.50738

## Sheet: Table1
Table 1 Effects of Pro-Ca spraying at the booting stage on internode length and panicle traits of rice under salt stress.
HHZ	Treatments	Uppermost internode length (cm)	Panicle length (cm)	Panicle weight (g)	Number of primary branches	Number of secondary branches
	CK	35.3	17.98	7.75	11.75	15.25		HHZ	Uppermost internode length(cm)				XLY900	Uppermost internode length(cm)
	CK	35.3	18.63	8.16	11.75	13.75			Treatments	Average	SE			Treatments	Average	SE
	CK	35.5	19.55	8.18	11.75	15			CK	37.12	0.586098			CK	34.83	0.906281
	CK	36.2	19.75	8.53	12	14.5			NaCl	29.46	0.721911			NaCl	25.98	0.679346
	CK	36.3	19.98	9.46	12	19			Pro-Ca + NaCl	32.85	0.554627			Pro-Ca + NaCl	31.7	0.961018
	CK	36.4	20.48	9.77	12	19.67			Pro-Ca	34.69	0.919354			Pro-Ca	32.79	0.774087
	CK	37.3	20.93	9.83	12.25	28
	CK	39	21.17	10.03	12.4	10.4			Panicle length(cm)					Panicle length(cm)
	CK	39.8	21.17	10.71	12.67	21.67			Treatments	Average	SE			Treatments	Average	SE
	CK	40.1	21.42	10.25	13	16.33			CK	20.106	0.364537			CK	19.803	0.196622
	NaCl	25.2	17.53	2.79	9.25	26			NaCl	18.841	0.218151			NaCl	18.151	0.18743
	NaCl	26.2	18.3	3.67	9.67	5			Pro-Ca + NaCl	21.13	0.158135			Pro-Ca + NaCl	19.617	0.208567
	NaCl	27.8	18.43	4.64	10	12			Pro-Ca	20.588	0.40382			Pro-Ca	19.85	0.230159
	NaCl	29.6	18.57	4.81	10.25	6.75
	NaCl	30.3	18.67	5.26	10.33	6.67			Panicle weight(g)					Panicle weight(g)
	NaCl	30.5	18.73	5.69	10.6	20			Treatments	Average	SE			Treatments	Average	SE
	NaCl	30.6	19.5	6.18	10.75	13.5			CK	9.267	0.324712			CK	10.937	0.667962
	NaCl	31.2	19.53	6.73	10.8	21.6			NaCl	5.376	0.45099			NaCl	6.979	0.412196
	NaCl	31.4	19.55	6.92	11	14.5			Pro-Ca + NaCl	9.572	0.66037			Pro-Ca + NaCl	9.129	0.679121
	NaCl	31.8	19.6	7.07	11.25	12			Pro-Ca	10.55	0.432838			Pro-Ca	8.737	0.663226
	Pro-Ca + NaCl	30.8	20.4	6.19	11.5	13.25
	Pro-Ca + NaCl	31	20.6	7.25	11.75	17			Number of primary branches					Number of primary branches
	Pro-Ca + NaCl	31.7	20.8	8.23	11.75	19.25			Treatments	Average	SE			Treatments	Average	SE
	Pro-Ca + NaCl	32	20.88	8.28	12	18.67			CK	12.157	0.133849			CK	13.7	0.220998
	Pro-Ca + NaCl	32.2	20.97	9.64	12	24			NaCl	10.39	0.195698			NaCl	12.468	0.341291
	Pro-Ca + NaCl	32.4	21.1	9.73	12.25	18.25			Pro-Ca + NaCl	12.278	0.213733			Pro-Ca + NaCl	13.592	0.12939
	Pro-Ca + NaCl	33	21.47	10.51	12.33	16.67			Pro-Ca	11.68	0.305574			Pro-Ca	13.508	0.236323
	Pro-Ca + NaCl	34.1	21.5	11.22	12.33	10
	Pro-Ca + NaCl	35.4	21.55	12.17	13.2	23.6			Number of secondary branches					Number of secondary branches
	Pro-Ca + NaCl	35.9	22.03	12.5	13.67	32.67			Treatments	Average	SE			Treatments	Average	SE
	Pro-Ca	29.8	18.8	8.86	10.33	27.67			CK	17.357	1.56542			CK	31.924	1.33233
	Pro-Ca	30.4	18.85	9	10.75	28.25			NaCl	13.802	2.19383			NaCl	29.433	1.49558
	Pro-Ca	34.2	19.35	9.02	10.8	15.2			Pro-Ca + NaCl	19.336	1.98921			Pro-Ca + NaCl	32.616	2.00266
	Pro-Ca	34.3	20.28	10.23	11	14.67			Pro-Ca	21.879	1.81631			Pro-Ca	31.792	2.0208
	Pro-Ca	34.6	20.74	10.42	11.5	29.5
	Pro-Ca	34.9	20.78	10.72	11.75	15
	Pro-Ca	35.3	20.9	10.75	12.25	21.25
	Pro-Ca	36.4	21.8	11.39	12.5	20.25
	Pro-Ca	37.8	22	12.15	12.67	26
	Pro-Ca	39.2	22.38	12.96	13.25	21
XLY900	Treatments	Uppermost internode length (cm)	Panicle length (cm)	Panicle weight (g)	Number of primary branches	Number of secondary branches
	CK	31.8	19.07	8.38	12.5	28
	CK	32	19.1	8.47	13	26.33
	CK	32	19.17	9.13	13.33	33.33
	CK	33.2	19.24	9.93	13.33	35
	CK	34.3	19.57	10.31	13.5	27.75
	CK	34.7	20.23	11.22	14	32
	CK	35.5	20.35	11.66	14	27.67
	CK	35.7	20.4	12.52	14	37.5
	CK	39.5	20.43	12.76	14.67	37.33
	CK	39.6	20.47	14.99	14.67	34.33
	NaCl	23	17.23	5.48	10.67	24
	NaCl	24	17.53	5.49	11	25
	NaCl	24.4	17.65	5.74	11.67	27.67
	NaCl	24.4	17.77	5.76	12	28.67
	NaCl	24.4	18.17	7.15	12.67	22.33
	NaCl	27	18.2	7.18	13	36
	NaCl	27.5	18.43	7.32	13	34.33
	NaCl	28	18.77	8.3	13.33	34.33
	NaCl	28	18.83	8.52	13.67	32
	NaCl	29.1	18.93	8.85	13.67	30
	Pro-Ca + NaCl	27.3	18.93	6.28	13	34
	Pro-Ca + NaCl	28.6	19	7	13	31
	Pro-Ca + NaCl	29	19.23	8.34	13.25	36.25
	Pro-Ca + NaCl	31.1	19.28	8.37	13.5	40.5
	Pro-Ca + NaCl	31.3	19.5	8.56	13.5	22.75
	Pro-Ca + NaCl	31.5	19.53	8.59	13.67	32.33
	Pro-Ca + NaCl	31.8	19.65	9.54	14	33.33
	Pro-Ca + NaCl	34	19.87	9.77	14	27
	Pro-Ca + NaCl	35.7	19.95	10.87	14	43
	Pro-Ca + NaCl	36.7	21.23	13.97	14	26
	Pro-Ca	30.5	19	6.74	12	32
	Pro-Ca	30.7	19.2	6.79	12.5	41.5
	Pro-Ca	30.9	19.27	6.81	13.33	29
	Pro-Ca	31.1	19.5	7.68	13.5	38.5
	Pro-Ca	31.3	19.5	8.15	13.67	31.67
	Pro-Ca	32.2	19.55	8.42	13.67	20
	Pro-Ca	33.4	20.27	8.53	13.75	36.75
	Pro-Ca	34.8	20.33	9.79	14	24.5
	Pro-Ca	35.2	20.65	11.53	14.33	33.33
	Pro-Ca	37.8	21.23	12.93	14.33	30.67

## Sheet: Table2
Table 2 Effects of Pro-Ca spraying at the booting stage on rice yield and its constituent factors under salt stress.
HHZ	Treatments	Grain number per panicle	Seed setting rate	Thousand grains weight(g)	Yield(g/plant)
	CK	433	0.817552	24.887	8.81		HHZ	Grain number per panicle				XLY900	Grain number per panicle
	CK	365	0.989041	24.3213	8.78			Treatments	Average	SE			Treatments	Average	SE
	CK	393	0.765903	23.3223	7.02			CK	407.2	17.0012			CK	517.4	45.9071
	CK	386	0.84456	26.3497	8.59			NaCl	284.6	29.8624			NaCl	395.2	29.6891
	CK	459	0.849673	23.7179	9.25			Pro-Ca + NaCl	443.2	31.123			Pro-Ca + NaCl	508.2	11.0788
	NaCl	331	0.443798	21.6931	5.2			Pro-Ca	480.2	30.7204			Pro-Ca	441.6	59.9071
	NaCl	215	0.570997	22.4444	4.1
	NaCl	345	0.513043	22.6562	4.21			Seed setting rate					Seed setting rate
	NaCl	209	0.502392	22.4907	4.35			Treatments	Average	SE			Treatments	Average	SE
	NaCl	323	0.55418	20.4724	5.05			CK	0.853346	0.0370346			CK	0.730931	0.0231559
	Pro-Ca + NaCl	448	0.844492	21.966	9.05			NaCl	0.516882	0.0222322			NaCl	0.583602	0.0430056
	Pro-Ca + NaCl	528	0.878788	23.9655	11.12			Pro-Ca + NaCl	0.854171	0.00642607			Pro-Ca + NaCl	0.688218	0.033393
	Pro-Ca + NaCl	384	0.848958	22.7301	7.41			Pro-Ca	0.790063	0.0222107			Pro-Ca	0.663184	0.0470267
	Pro-Ca + NaCl	492	0.844221	23.3333	10.43
	Pro-Ca + NaCl	364	0.854396	21.2862	6.62			Thousand grains weight(g)					Thousand grains weight(g)
	Pro-Ca	493	0.770791	26.5789	10.1			Treatments	Average	SE			Treatments	Average	SE
	Pro-Ca	575	0.77913	25.8482	11.58			CK	24.5196	0.529141			CK	27.1135	0.358541
	Pro-Ca	386	0.823834	24.0252	7.64			NaCl	21.9514	0.405264			NaCl	24.6626	0.388315
	Pro-Ca	454	0.852423	25.1421	9.73			Pro-Ca + NaCl	22.6562	0.476004			Pro-Ca + NaCl	25.2409	0.619461
	Pro-Ca	493	0.724138	25.1541	8.98			Pro-Ca	25.3497	0.42399			Pro-Ca	25.2491	0.455014
XLY900	Treatments	Grain number per panicle	Seed setting rate	Thousand grains weight(g)	Yield(g/plant)			Yield(g/plant)					Yield(g/plant)
	CK	357	0.759104	26.679	7.23			Treatments	Average	SE			Treatments	Average	SE
	CK	473	0.7463	27.8187	9.82			CK	8.49	0.38308			CK	9.628	0.706268
	CK	603	0.660033	26.2139	9.07			NaCl	4.582	0.226438			NaCl	5.644	0.496514
	CK	580	0.698276	28.0905	11.18			Pro-Ca + NaCl	8.926	0.857523			Pro-Ca + NaCl	8.408	1.10164
	CK	574	0.790941	26.7654	10.84			Pro-Ca	9.606	0.64858			Pro-Ca	8.2	0.905124
	NaCl	293	0.716724	24.3333	5.11
	NaCl	399	0.614035	24.6531	6.04
	NaCl	377	0.458886	23.9884	4.15
	NaCl	449	0.532294	24.1841	5.78
	NaCl	458	0.59607	26.1538	7.14
	Pro-Ca + NaCl	508	0.590631	24.5517	7.12
	Pro-Ca + NaCl	491	0.628392	27.5415	8.29
	Pro-Ca + NaCl	479	0.761719	24.8718	7.53
	Pro-Ca + NaCl	542	0.718412	25.3266	6.45
	Pro-Ca + NaCl	521	0.741935	23.913	12.65
	Pro-Ca	324	0.79321	24.5963	6.63
	Pro-Ca	373	0.565684	25.1064	7.6
	Pro-Ca	344	0.572674	24.7393	6.34
	Pro-Ca	625	0.7552	24.7656	11.21
	Pro-Ca	542	0.629151	27.0381	9.22

## Sheet: directions of raw date
The raw data of this table were generated and collected by XiXin Huang, Fengyan Meng and Yin jie in 2021, and analyzed by Naijie Feng and Hang Zhou in 2022.
